# Supplementary material for: Whole-Genome Sequencing and Comparative Genome Analysis of Bacillus subtilis Strains Isolated from Non-Salted Fermented Soybean Foods
Source: PubMed Central journal article supplement (PMC4624242; doi:10.1371/journal.pone.0141369), 2015-10-27
Supplement: pone.0141369.s001.pdf [file pone.0141369.s001.pdf]

## Additional information of the results

Whole-genome sequencing and comparative genome analysis of *Bacillus subtilis* strains  
isolated from non-salted fermented soybean foods

Mayumi Kamada, Sumitaka Hase, Kazushi Fujii, Masato Miyake, Kengo Sato,  
Keitarou Kimura, Yasubumi Sakakibara

### Contents:

|                                                                                           |    |
|-------------------------------------------------------------------------------------------|----|
| The result details for “Genome sequencing” .....                                          | 2  |
| The result details for the analysis of “Insertion sequence” .....                         | 2  |
| The details for “Mapping and variant calling” .....                                       | 3  |
| The result details for the analysis “Biotin auxotrophy of <i>B. subtilis</i> natto” ..... | 4  |
| The result details for the analysis “Production of subtilisin NAT” .....                  | 7  |
| The result details for the analysis “Production of $\gamma$ PGA” .....                    | 11 |
| The result details for the analysis “Motility of <i>B. subtilis</i> ” .....               | 13 |
| The result details for MLST analysis .....                                                | 17 |

## The result details for “Genome sequencing”

**Table A.** Details of sequencing output and error-corrected reads by Trowel

|                                  | KorC1      | LaoA1      | MyaA2      | ThaB       | NepD5      | NAFM5     | NARUSE     | TAKAHASHI  |
|----------------------------------|------------|------------|------------|------------|------------|-----------|------------|------------|
| Original sequencing output       |            |            |            |            |            |           |            |            |
| No. paired-reads                 | 48,140,926 | 73,283,254 | 50,775,916 | 37,352,714 | 57,369,358 | 1,471,340 | 80,341,082 | 74,090,210 |
| Read length                      | 58         | 58         | 58         | 58         | 56         | 56        | 56         | 56         |
| Q30 (%)                          | 32.03      | 34.20      | 31.54      | 33.18      | 27.93      | 43.49     | 16.12      | 8.14       |
| Inferred coverage*               | 217.83     | 354.09     | 226.23     | 175.08     | 218.58     | 68.06     | 176.66     | 82.32      |
| After error correction by Trowel |            |            |            |            |            |           |            |            |
| Min read length (bp)             | 10         | 9          | 6          | 9          | 13         | 13        | 12         | 8          |
| Mean read length (bp)            | 57.99      | 57.99      | 57.98      | 57.98      | 55.99      | 55.99     | 55.99      | 55.97      |
| Max read length (bp)             | 58         | 58         | 58         | 58         | 56         | 56        | 56         | 56         |
| Inferred coverage                | 217.79     | 354.03     | 226.15     | 175.01     | 218.54     | 68.04     | 176.62     | 82.27      |

\* Inferred coverage is calculated by (read length number of reads)/BEST195 genome length, where the BEST195 genome length is 4,105,380 bp. For corrected reads, we used the mean read length for calculations.

## The result details for the analysis of “Insertion sequence”

**Table B.** BLASTn hits with the transposase of the insertion sequence in BEST195

|                                   | KorC1 | LaoA1 | MyaA2 | ThaB | NepD5 | NAFM5 | NARUSE | TAKAHASHI |
|-----------------------------------|-------|-------|-------|------|-------|-------|--------|-----------|
| Total hit with IS                 | 24    | 1     | 13    | 43   | 25    | 13    | 14     | 12        |
| No. hit with IS4Bsu1              | 1     | 0     | 3     | 2    | 2     | 3     | 3      | 3         |
| No. hit with ISBma2               | 1     | 1     | 3     | 1    | 1     | 2     | 1      | 1         |
| No. hit with IS643                | 3     | 0     | 2     | 2    | 2     | 2     | 2      | 2         |
| No. hit with IS256Bsu1            | 1     | 0     | 1     | 1    | 2     | 2     | 1      | 1         |
| No. hit with ISLmo1               | 15    | 0     | 1     | 34   | 15    | 1     | 4      | 2         |
| No. hit with putative transposase | 3     | 0     | 3     | 3    | 3     | 3     | 3      | 3         |
| Aligned with BEST195              | 21    | 0     | 9     | 35   | 23    | 13    | 13     | 11        |

## The details for “Mapping and variant calling”

**Table C.** Sequence mapping and variant calls

|                                                 | KorC1   | LaoA1    | MyaA2  | ThaB    | NepD5  | NAFM5   | NARUSE  | TAKAHASHI |
|-------------------------------------------------|---------|----------|--------|---------|--------|---------|---------|-----------|
| Mapping rate (%)                                | 88.12   | 78.23    | 89.42  | 79.31   | 95.66  | 99.16   | 94.85   | 92.66     |
| Coverage                                        | 185.34  | 259.5    | 194.28 | 125.09  | 200.98 | 64.26   | 161.95  | 74.6      |
| [SD]                                            | [77.32] | [130.19] | [82.5] | [53.23] | [81.3] | [23.85] | [86.42] | [64.27]   |
| No. SNPs                                        | 20375   | 40548    | 17092  | 17010   | 5129   | 3       | 43      | 40        |
| No. Indels                                      | 554     | 943      | 470    | 494     | 142    | 0       | 1       | 5         |
| No. variants with high-impact                   | 270     | 395      | 206    | 244     | 78     | 0       | 1       | 4         |
| No. variants with moderate-impact               | 4806    | 9154     | 4035   | 3963    | 1243   | 0       | 14      | 26        |
| No. genes with high or moderate-impact variants | 1416    | 2233     | 1147   | 1214    | 365    | 0       | 6       | 23        |

**Table D.** Gene Ontology term (at level2) counts for genes with variations predicted to have high and moderate impacts for each strain

|                                               | KorC1 | LaoA1 | MyaA1 | ThaB | NepD5 | NARUSE | TAKAHASHI |
|-----------------------------------------------|-------|-------|-------|------|-------|--------|-----------|
| Reproduction                                  | 1     | 4     | 1     | 1    | 1     | 0      | 0         |
| Metabolic process                             | 999   | 1562  | 785   | 811  | 250   | 13     | 12        |
| Cellular process                              | 894   | 1450  | 701   | 756  | 230   | 10     | 18        |
| Biological adhesion                           | 1     | 2     | 0     | 1    | 0     | 0      | 0         |
| Signaling                                     | 86    | 109   | 65    | 54   | 12    | 0      | 3         |
| Multicellular organismal process              | 1     | 0     | 1     | 0    | 0     | 0      | 0         |
| Developmental process                         | 11    | 42    | 14    | 18   | 10    | 0      | 2         |
| Locomotion                                    | 6     | 16    | 5     | 4    | 1     | 0      | 1         |
| Single-organism process                       | 823   | 1317  | 647   | 711  | 234   | 15     | 17        |
| Positive regulation of biological process     | 3     | 3     | 4     | 2    | 1     | 0      | 0         |
| Negative regulation of biological process     | 0     | 4     | 0     | 0    | 3     | 0      | 0         |
| Regulation of biological process              | 163   | 235   | 132   | 113  | 34    | 0      | 4         |
| Response to stimulus                          | 145   | 226   | 116   | 114  | 32    | 0      | 6         |
| Localization                                  | 277   | 439   | 208   | 274  | 80    | 2      | 4         |
| Multi-organism process                        | 3     | 9     | 4     | 6    | 4     | 0      | 0         |
| Biological regulation                         | 164   | 239   | 133   | 114  | 34    | 0      | 4         |
| Cellular component organization or biogenesis | 28    | 67    | 23    | 32   | 13    | 0      | 2         |

**The result details for the analysis “Biotin auxotrophy of *B. subtilis natto*”**

**Table E.** Variations in the *bio* operon

| gene        | locus_tag  | strain | position | ref     | alt | impact   | effect                |
|-------------|------------|--------|----------|---------|-----|----------|-----------------------|
| <i>bioB</i> | BSNT_09440 | KorC1  | 2852638  | A       | C   | MODERATE | NON_SYNONYMOUS_CODING |
|             |            | LaoA1  | 2852418  | A       | T   | MODERATE | NON_SYNONYMOUS_CODING |
|             |            |        | 2852638  | A       | C   | MODERATE | NON_SYNONYMOUS_CODING |
|             |            | MyaA2  | 2852418  | A       | T   | MODERATE | NON_SYNONYMOUS_CODING |
|             |            |        | 2852638  | A       | C   | MODERATE | NON_SYNONYMOUS_CODING |
|             |            | ThaB   | 2852346  | C       | T   | MODERATE | NON_SYNONYMOUS_CODING |
|             |            |        | 2852418  | A       | T   | MODERATE | NON_SYNONYMOUS_CODING |
|             |            |        | 2852638  | A       | C   | MODERATE | NON_SYNONYMOUS_CODING |
|             |            |        | 2852844  | C       | T   | MODERATE | NON_SYNONYMOUS_CODING |
| <i>bioD</i> | BSNT_09441 | KorC1  | 2853868  | C       | T   | MODERATE | NON_SYNONYMOUS_CODING |
|             |            | LaoA1  | 2853275  | T       | C   | MODERATE | NON_SYNONYMOUS_CODING |
|             |            |        | 2853868  | C       | T   | MODERATE | NON_SYNONYMOUS_CODING |
|             |            |        | 2853880  | T       | C   | MODERATE | NON_SYNONYMOUS_CODING |
|             |            |        | 2853881  | T       | G   | MODERATE | NON_SYNONYMOUS_CODING |
|             |            |        | 2853896  | G       | T   | MODERATE | NON_SYNONYMOUS_CODING |
|             |            | MyaA2  | 2853275  | T       | C   | MODERATE | NON_SYNONYMOUS_CODING |
|             |            |        | 2853361  | AC      | A   | HIGH     | FRAME_SHIFT           |
|             |            |        | 2853868  | C       | T   | MODERATE | NON_SYNONYMOUS_CODING |
|             |            |        | 2853880  | T       | C   | MODERATE | NON_SYNONYMOUS_CODING |
|             |            |        | 2853881  | T       | G   | MODERATE | NON_SYNONYMOUS_CODING |
|             |            |        | 2853896  | G       | T   | MODERATE | NON_SYNONYMOUS_CODING |
|             |            | ThaB   | 2853275  | T       | C   | MODERATE | NON_SYNONYMOUS_CODING |
|             |            |        | 2853868  | C       | T   | MODERATE | NON_SYNONYMOUS_CODING |
|             |            |        | 2853880  | T       | C   | MODERATE | NON_SYNONYMOUS_CODING |
|             |            |        | 2853881  | T       | G   | MODERATE | NON_SYNONYMOUS_CODING |
|             |            |        | 2853896  | G       | T   | MODERATE | NON_SYNONYMOUS_CODING |
| BSNT_09442  | BSNT_09442 | KorC1  | 2853964  | TATGCAG | T   | MODERATE | CODON_DELETION        |
|             |            |        | 2853971  | C       | G   | MODERATE | NON_SYNONYMOUS_CODING |
|             |            |        | 2853997  | T       | G   | MODERATE | NON_SYNONYMOUS_CODING |
|             |            |        | 2854006  | C       | G   | MODERATE | NON_SYNONYMOUS_CODING |
|             |            |        | 2854020  | A       | G   | MODERATE | NON_SYNONYMOUS_CODING |

|             |            |       |         |   |   |          |                       |
|-------------|------------|-------|---------|---|---|----------|-----------------------|
|             |            |       | 2854062 | C | T | MODERATE | NON_SYNONYMOUS_CODING |
|             |            |       | 2854144 | G | A | MODERATE | NON_SYNONYMOUS_CODING |
|             |            | LaoA1 | 2853997 | T | G | MODERATE | NON_SYNONYMOUS_CODING |
|             |            |       | 2854006 | C | G | MODERATE | NON_SYNONYMOUS_CODING |
|             |            |       | 2854019 | C | T | MODERATE | NON_SYNONYMOUS_CODING |
|             |            |       | 2854020 | A | G | MODERATE | NON_SYNONYMOUS_CODING |
|             |            |       | 2854098 | T | A | MODERATE | NON_SYNONYMOUS_CODING |
|             |            |       | 2854132 | T | G | MODERATE | NON_SYNONYMOUS_CODING |
|             |            |       | 2854229 | G | C | MODERATE | NON_SYNONYMOUS_CODING |
|             |            |       | 2854288 | T | A | MODERATE | NON_SYNONYMOUS_CODING |
|             |            |       | 2854392 | T | C | MODERATE | NON_SYNONYMOUS_CODING |
|             |            |       | 2854515 | A | G | MODERATE | NON_SYNONYMOUS_CODING |
|             |            |       | 2854810 | T | C | MODERATE | NON_SYNONYMOUS_CODING |
|             |            |       | 2854993 | T | C | MODERATE | NON_SYNONYMOUS_CODING |
|             |            | MyaA2 | 2853997 | T | G | MODERATE | NON_SYNONYMOUS_CODING |
|             |            |       | 2854006 | C | G | MODERATE | NON_SYNONYMOUS_CODING |
|             |            |       | 2854020 | A | G | MODERATE | NON_SYNONYMOUS_CODING |
|             |            |       | 2854098 | T | A | MODERATE | NON_SYNONYMOUS_CODING |
|             |            |       | 2854132 | T | G | MODERATE | NON_SYNONYMOUS_CODING |
|             |            |       | 2854209 | T | A | MODERATE | NON_SYNONYMOUS_CODING |
|             |            |       | 2854515 | A | G | MODERATE | NON_SYNONYMOUS_CODING |
|             |            | ThaB  | 2853997 | T | G | MODERATE | NON_SYNONYMOUS_CODING |
|             |            |       | 2854006 | C | G | MODERATE | NON_SYNONYMOUS_CODING |
|             |            |       | 2854020 | A | G | MODERATE | NON_SYNONYMOUS_CODING |
|             |            |       | 2854098 | T | A | MODERATE | NON_SYNONYMOUS_CODING |
|             |            |       | 2854132 | T | G | MODERATE | NON_SYNONYMOUS_CODING |
|             |            |       | 2854209 | T | A | MODERATE | NON_SYNONYMOUS_CODING |
| <i>bioA</i> | BSNT_09443 | KorC1 | 2855174 | G | T | MODERATE | NON_SYNONYMOUS_CODING |
|             |            |       | 2855831 | A | G | MODERATE | NON_SYNONYMOUS_CODING |
|             |            | LaoA1 | 2855120 | T | A | MODERATE | NON_SYNONYMOUS_CODING |
|             |            |       | 2855751 | T | C | MODERATE | NON_SYNONYMOUS_CODING |
|             |            |       | 2855831 | A | G | MODERATE | NON_SYNONYMOUS_CODING |
|             |            |       | 2856293 | G | T | MODERATE | NON_SYNONYMOUS_CODING |
|             |            | MyaA2 | 2855120 | T | A | MODERATE | NON_SYNONYMOUS_CODING |

|            |            |       |         |   |   |          |                       |
|------------|------------|-------|---------|---|---|----------|-----------------------|
|            |            |       | 2855193 | T | A | MODERATE | NON_SYNONYMOUS_CODING |
|            |            |       | 2855350 | A | G | MODERATE | NON_SYNONYMOUS_CODING |
|            |            |       | 2855751 | T | C | MODERATE | NON_SYNONYMOUS_CODING |
|            |            |       | 2855831 | A | G | MODERATE | NON_SYNONYMOUS_CODING |
|            |            |       | 2856209 | T | C | MODERATE | NON_SYNONYMOUS_CODING |
|            |            |       | 2856293 | G | T | MODERATE | NON_SYNONYMOUS_CODING |
|            |            | ThaB  | 2855831 | A | G | MODERATE | NON_SYNONYMOUS_CODING |
| BSNT_09444 | BSNT_09444 | LaoA1 | 2856499 | T | G | HIGH     | STOP_LOST             |
|            |            |       | 2856615 | T | C | MODERATE | NON_SYNONYMOUS_CODING |
|            |            |       | 2856630 | G | A | MODERATE | NON_SYNONYMOUS_CODING |
|            |            |       | 2856911 | C | T | MODERATE | NON_SYNONYMOUS_CODING |
|            |            |       | 2856936 | A | G | MODERATE | NON_SYNONYMOUS_CODING |
|            |            |       | 2856972 | G | A | MODERATE | NON_SYNONYMOUS_CODING |
|            |            | MyaA2 | 2856499 | T | G | HIGH     | STOP_LOST             |
|            |            |       | 2856555 | T | C | MODERATE | NON_SYNONYMOUS_CODING |
|            |            |       | 2856815 | T | C | MODERATE | NON_SYNONYMOUS_CODING |
|            |            |       | 2856911 | C | T | MODERATE | NON_SYNONYMOUS_CODING |
|            |            |       | 2856936 | A | G | MODERATE | NON_SYNONYMOUS_CODING |

## The result details for the analysis “Production of subtilisin NAT”

**Table F.** Variations in *aprN* and neighboring genes

| gene        | locus_tag  | strain | position | ref | alt | impact   | effect                |
|-------------|------------|--------|----------|-----|-----|----------|-----------------------|
| <i>yhfJ</i> | BSNT_07462 | LaoA1  | 1100394  | A   | C   | MODERATE | NON_SYNONYMOUS_CODING |
| <i>yhfK</i> | BSNT_07463 | KorC1  | 1100674  | G   | A   | MODERATE | NON_SYNONYMOUS_CODING |
|             |            |        | 1100842  | A   | G   | MODERATE | NON_SYNONYMOUS_CODING |
|             |            |        | 1101045  | G   | T   | MODERATE | NON_SYNONYMOUS_CODING |
|             |            |        | 1101058  | A   | G   | MODERATE | NON_SYNONYMOUS_CODING |
|             |            | LaoA1  | 1100576  | A   | G   | MODERATE | NON_SYNONYMOUS_CODING |
|             |            |        | 1100842  | A   | G   | MODERATE | NON_SYNONYMOUS_CODING |
|             |            |        | 1101045  | G   | T   | MODERATE | NON_SYNONYMOUS_CODING |
|             |            | MyaA2  | 1100674  | G   | A   | MODERATE | NON_SYNONYMOUS_CODING |
|             |            |        | 1100842  | A   | G   | MODERATE | NON_SYNONYMOUS_CODING |
|             |            |        | 1101045  | G   | T   | MODERATE | NON_SYNONYMOUS_CODING |
|             |            |        | 1101058  | A   | G   | MODERATE | NON_SYNONYMOUS_CODING |
|             |            | ThaB   | 1100842  | A   | G   | MODERATE | NON_SYNONYMOUS_CODING |
| <i>yhfL</i> | BSNT_07464 | KorC1  | 1101376  | T   | C   | MODERATE | NON_SYNONYMOUS_CODING |
|             |            |        | 1102034  | G   | A   | MODERATE | NON_SYNONYMOUS_CODING |
|             |            | LaoA1  | 1102034  | G   | A   | MODERATE | NON_SYNONYMOUS_CODING |
|             |            |        | 1102099  | A   | T   | MODERATE | NON_SYNONYMOUS_CODING |
|             |            | MyaA2  | 1101376  | T   | C   | MODERATE | NON_SYNONYMOUS_CODING |
|             |            |        | 1102034  | G   | A   | MODERATE | NON_SYNONYMOUS_CODING |
|             |            | ThaB   | 1101469  | A   | G   | MODERATE | NON_SYNONYMOUS_CODING |
|             |            |        | 1101600  | G   | T   | MODERATE | NON_SYNONYMOUS_CODING |
| <i>yhfM</i> | BSNT_07465 | KorC1  | 1102936  | G   | A   | MODERATE | NON_SYNONYMOUS_CODING |
|             |            | MyaA2  | 1102957  | C   | T   | MODERATE | NON_SYNONYMOUS_CODING |
|             |            | ThaB   | 1102957  | C   | T   | MODERATE | NON_SYNONYMOUS_CODING |
|             |            | NepD5  | 1102957  | C   | T   | MODERATE | NON_SYNONYMOUS_CODING |
| <i>yhfN</i> | BSNT_07466 | LaoA1  | 1103547  | G   | T   | MODERATE | NON_SYNONYMOUS_CODING |
|             |            |        | 1103575  | G   | A   | MODERATE | NON_SYNONYMOUS_CODING |
|             |            |        | 1104009  | T   | A   | MODERATE | NON_SYNONYMOUS_CODING |
|             |            |        | 1104650  | C   | T   | MODERATE | NON_SYNONYMOUS_CODING |
|             |            | ThaB   | 1103575  | G   | A   | MODERATE | NON_SYNONYMOUS_CODING |
|             |            |        | 1103673  | C   | G   | MODERATE | NON_SYNONYMOUS_CODING |

|             |            |       |         |           |   |          |                       |
|-------------|------------|-------|---------|-----------|---|----------|-----------------------|
|             |            |       | 1103869 | A         | G | MODERATE | NON_SYNONYMOUS_CODING |
|             |            |       | 1104009 | T         | A | MODERATE | NON_SYNONYMOUS_CODING |
|             |            |       | 1104644 | A         | G | MODERATE | NON_SYNONYMOUS_CODING |
|             |            |       | 1104646 | A         | G | MODERATE | NON_SYNONYMOUS_CODING |
| <i>aprN</i> | BSNT_07467 | KorC1 | 1104970 | A         | G | MODERATE | NON_SYNONYMOUS_CODING |
|             |            |       | 1105061 | T         | A | MODERATE | NON_SYNONYMOUS_CODING |
|             |            |       | 1105157 | T         | A | MODERATE | NON_SYNONYMOUS_CODING |
|             |            | LaoA1 | 1104970 | A         | G | MODERATE | NON_SYNONYMOUS_CODING |
|             |            |       | 1105061 | T         | A | MODERATE | NON_SYNONYMOUS_CODING |
|             |            |       | 1105157 | T         | A | MODERATE | NON_SYNONYMOUS_CODING |
|             |            | MyaA2 | 1104970 | A         | G | MODERATE | NON_SYNONYMOUS_CODING |
|             |            |       | 1105061 | T         | A | MODERATE | NON_SYNONYMOUS_CODING |
|             |            |       | 1105157 | T         | A | MODERATE | NON_SYNONYMOUS_CODING |
|             |            | ThaB  | 1104769 | T         | C | MODERATE | NON_SYNONYMOUS_CODING |
| BSNT_07468  | BSNT_07468 | KorC1 | 1106185 | T         | G | MODERATE | NON_SYNONYMOUS_CODING |
|             |            |       | 1106210 | T         | A | MODERATE | NON_SYNONYMOUS_CODING |
|             |            |       | 1106233 | G         | A | HIGH     | STOP_GAINED           |
|             |            |       | 1106252 | AATTCGATT | A | HIGH     | FRAME_SHIFT           |
|             |            |       | 1106278 | AT        | A | HIGH     | FRAME_SHIFT           |
|             |            |       | 1106302 | G         | A | MODERATE | NON_SYNONYMOUS_CODING |
|             |            | LaoA1 | 1106185 | T         | G | MODERATE | NON_SYNONYMOUS_CODING |
|             |            |       | 1106210 | T         | A | MODERATE | NON_SYNONYMOUS_CODING |
|             |            |       | 1106233 | G         | A | HIGH     | STOP_GAINED           |
|             |            |       | 1106252 | AATTCGATT | A | HIGH     | FRAME_SHIFT           |
|             |            |       | 1106278 | AT        | A | HIGH     | FRAME_SHIFT           |
|             |            |       | 1106302 | G         | A | MODERATE | NON_SYNONYMOUS_CODING |
|             |            | MyaA2 | 1106185 | T         | G | MODERATE | NON_SYNONYMOUS_CODING |
|             |            |       | 1106210 | T         | A | MODERATE | NON_SYNONYMOUS_CODING |
|             |            |       | 1106233 | G         | A | HIGH     | STOP_GAINED           |
|             |            |       | 1106252 | AATTCGATT | A | HIGH     | FRAME_SHIFT           |
|             |            |       | 1106278 | AT        | A | HIGH     | FRAME_SHIFT           |
|             |            |       | 1106286 | A         | G | MODERATE | NON_SYNONYMOUS_CODING |
|             |            |       | 1106302 | G         | A | MODERATE | NON_SYNONYMOUS_CODING |
| <i>yhfO</i> | BSNT_07469 | KorC1 | 1106335 | G         | A | MODERATE | NON_SYNONYMOUS_CODING |



|             |            |       |         |   |   |          |                       |
|-------------|------------|-------|---------|---|---|----------|-----------------------|
|             |            |       | 1106344 | C | A | MODERATE | NON_SYNONYMOUS_CODING |
|             |            |       | 1106456 | C | T | MODERATE | NON_SYNONYMOUS_CODING |
|             |            |       | 1106558 | C | T | MODERATE | NON_SYNONYMOUS_CODING |
|             |            |       | 1106563 | T | C | MODERATE | NON_SYNONYMOUS_CODING |
|             |            |       | 1106587 | G | T | MODERATE | NON_SYNONYMOUS_CODING |
|             |            |       | 1106621 | G | A | MODERATE | NON_SYNONYMOUS_CODING |
|             |            |       | 1106732 | C | G | MODERATE | NON_SYNONYMOUS_CODING |
|             |            | LaoA1 | 1106344 | C | A | MODERATE | NON_SYNONYMOUS_CODING |
|             |            |       | 1106456 | C | T | MODERATE | NON_SYNONYMOUS_CODING |
|             |            |       | 1106558 | C | T | MODERATE | NON_SYNONYMOUS_CODING |
|             |            |       | 1106563 | T | C | MODERATE | NON_SYNONYMOUS_CODING |
|             |            |       | 1106621 | G | A | MODERATE | NON_SYNONYMOUS_CODING |
|             |            | MyaA2 | 1106344 | C | A | MODERATE | NON_SYNONYMOUS_CODING |
|             |            |       | 1106347 | G | A | MODERATE | NON_SYNONYMOUS_CODING |
|             |            |       | 1106414 | T | A | MODERATE | NON_SYNONYMOUS_CODING |
|             |            |       | 1106558 | C | T | MODERATE | NON_SYNONYMOUS_CODING |
|             |            |       | 1106563 | T | C | MODERATE | NON_SYNONYMOUS_CODING |
|             |            |       | 1106587 | G | T | MODERATE | NON_SYNONYMOUS_CODING |
|             |            |       | 1106621 | G | A | MODERATE | NON_SYNONYMOUS_CODING |
|             |            |       | 1106732 | C | G | MODERATE | NON_SYNONYMOUS_CODING |
| <i>yhfP</i> | BSNT_07470 | LaoA1 | 1107069 | G | A | MODERATE | NON_SYNONYMOUS_CODING |
|             |            |       | 1107489 | G | A | MODERATE | NON_SYNONYMOUS_CODING |
| BSNT_07471  | BSNT_07471 | KorC1 | 1108102 | G | A | MODERATE | NON_SYNONYMOUS_CODING |
|             |            |       | 1108345 | C | G | MODERATE | NON_SYNONYMOUS_CODING |
|             |            |       | 1108444 | C | T | MODERATE | NON_SYNONYMOUS_CODING |
|             |            |       | 1108541 | T | C | MODERATE | NON_SYNONYMOUS_CODING |
|             |            |       | 1108835 | T | G | MODERATE | NON_SYNONYMOUS_CODING |
|             |            | LaoA1 | 1108122 | A | C | MODERATE | NON_SYNONYMOUS_CODING |
|             |            |       | 1108177 | A | G | MODERATE | NON_SYNONYMOUS_CODING |
|             |            |       | 1108345 | C | G | MODERATE | NON_SYNONYMOUS_CODING |
|             |            |       | 1108522 | G | A | MODERATE | NON_SYNONYMOUS_CODING |
|             |            |       | 1108541 | T | C | MODERATE | NON_SYNONYMOUS_CODING |
|             |            |       | 1108835 | T | G | MODERATE | NON_SYNONYMOUS_CODING |
|             |            | MyaA2 | 1108122 | A | C | MODERATE | NON_SYNONYMOUS_CODING |



The result details for the analysis “Production of  $\gamma$ PGA ”

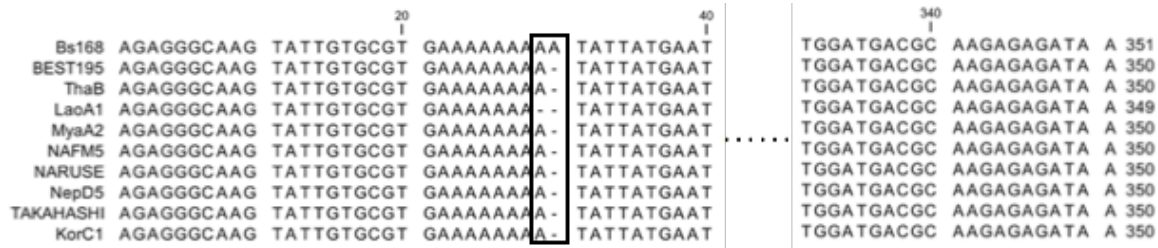

**Figure B.** The multiple sequence alignment of the eight *B. subtilis* strains, BEST195, and *B. subtilis* 168 at the corresponding region of *swrAA* (γvzD for BEST195). Every strain except strain LaoA1 has the same single adenine deletion that is present in BEST195.

**Table G.** Variations in genes constituting the ComQXPA quorum-sensing system

| gene        | locus_tag  | strain | position | ref | alt | impact   | effect                |
|-------------|------------|--------|----------|-----|-----|----------|-----------------------|
| <i>comA</i> | BSNT_09631 |        |          |     |     |          |                       |
| <i>comP</i> | BSNT_09632 | KorC1  | 3015386  | G   | A   | MODERATE | NON_SYNONYMOUS_CODING |
|             |            |        | 3015613  | A   | T   | MODERATE | NON_SYNONYMOUS_CODING |
|             |            |        | 3015617  | C   | T   | MODERATE | NON_SYNONYMOUS_CODING |
|             |            | LaoA1  | 3015617  | C   | T   | MODERATE | NON_SYNONYMOUS_CODING |
|             |            | MyaA2  | 3015613  | A   | T   | MODERATE | NON_SYNONYMOUS_CODING |
|             |            |        | 3015617  | C   | T   | MODERATE | NON_SYNONYMOUS_CODING |
| <i>comX</i> | BSNT_09633 |        |          |     |     |          |                       |
| <i>comQ</i> | BSNT_09634 |        |          |     |     |          |                       |

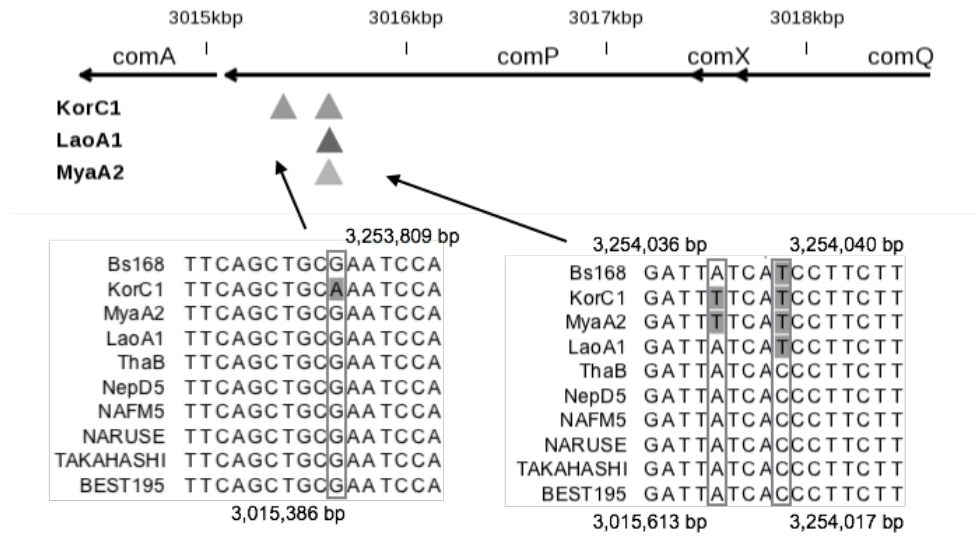

**Figure C.** The nucleotide changes in *comP* and the multiple sequence alignment of the corresponding regions. Triangle points represent a high or moderate variation at each position. A guanine-to-adenine nucleotide change was found only in strain KorC1, and an adenine-to-thymine nucleotide change was found only in strains KorC1 and MyaA2. Neither of the nucleotide changes were found in BEST195 and *B. subtilis* 168.

## The result details for the analysis “Motility of *B. subtilis*”

**Table H.** Variations in genes constituting the bacterial flagellum

| gene        | locus_tag  | strain | position | ref | alt | impact   | effect                |
|-------------|------------|--------|----------|-----|-----|----------|-----------------------|
| <i>fliD</i> | BSNT_10162 | LaoA1  | 3495433  | A   | G   | MODERATE | NON_SYNONYMOUS_CODING |
|             |            |        | 3495458  | C   | A   | MODERATE | NON_SYNONYMOUS_CODING |
|             |            |        | 3495812  | T   | C   | MODERATE | NON_SYNONYMOUS_CODING |
|             |            |        | 3495862  | T   | C   | MODERATE | NON_SYNONYMOUS_CODING |
|             |            |        | 3495872  | T   | A   | MODERATE | NON_SYNONYMOUS_CODING |
|             |            |        | 3495917  | A   | T   | MODERATE | NON_SYNONYMOUS_CODING |
|             |            |        | 3495925  | C   | T   | MODERATE | NON_SYNONYMOUS_CODING |
|             |            |        | 3495965  | C   | T   | MODERATE | NON_SYNONYMOUS_CODING |
|             |            |        | 3496010  | T   | C   | MODERATE | NON_SYNONYMOUS_CODING |
|             |            |        | 3496061  | T   | G   | MODERATE | NON_SYNONYMOUS_CODING |
|             |            |        | 3496076  | C   | T   | MODERATE | NON_SYNONYMOUS_CODING |
|             |            |        | 3496517  | T   | C   | MODERATE | NON_SYNONYMOUS_CODING |
|             |            |        | 3496628  | C   | T   | MODERATE | NON_SYNONYMOUS_CODING |
|             |            |        | 3496646  | G   | C   | MODERATE | NON_SYNONYMOUS_CODING |
|             |            |        | 3496657  | C   | G   | MODERATE | NON_SYNONYMOUS_CODING |
|             |            |        | 3496711  | T   | A   | MODERATE | NON_SYNONYMOUS_CODING |
|             |            |        | 3496732  | G   | T   | MODERATE | NON_SYNONYMOUS_CODING |
|             |            |        | 3496737  | T   | A   | MODERATE | NON_SYNONYMOUS_CODING |
|             |            |        | 3496755  | C   | G   | MODERATE | NON_SYNONYMOUS_CODING |
|             |            |        | 3496772  | T   | A   | MODERATE | NON_SYNONYMOUS_CODING |
|             |            |        | 3496825  | T   | G   | MODERATE | NON_SYNONYMOUS_CODING |
|             |            |        | 3496835  | C   | T   | MODERATE | NON_SYNONYMOUS_CODING |
| <i>flgL</i> | BSNT_10168 | LaoA1  | 3500119  | T   | C   | MODERATE | NON_SYNONYMOUS_CODING |
|             |            |        | 3500441  | C   | A   | MODERATE | NON_SYNONYMOUS_CODING |
| <i>flgK</i> | BSNT_10169 | KorC1  | 3501144  | A   | T   | MODERATE | NON_SYNONYMOUS_CODING |
|             |            | LaoA1  | 3501144  | A   | T   | MODERATE | NON_SYNONYMOUS_CODING |
| *BSNT_08139 | BSNT_08139 | LaoA1  | 1708952  | A   | G   | MODERATE | NON_SYNONYMOUS_CODING |
|             |            |        | 1708977  | G   | T   | MODERATE | NON_SYNONYMOUS_CODING |
|             |            |        | 1709116  | A   | G   | MODERATE | NON_SYNONYMOUS_CODING |
|             |            |        | 1709178  | G   | A   | MODERATE | NON_SYNONYMOUS_CODING |
|             |            |        | 1709203  | A   | G   | MODERATE | NON_SYNONYMOUS_CODING |

|             |            |       |         |    |                        |          |                       |
|-------------|------------|-------|---------|----|------------------------|----------|-----------------------|
|             |            |       | 1709219 | G  | A                      | MODERATE | NON_SYNONYMOUS_CODING |
|             |            |       | 1709244 | T  | A                      | MODERATE | NON_SYNONYMOUS_CODING |
|             |            |       | 1709263 | G  | A                      | MODERATE | NON_SYNONYMOUS_CODING |
|             |            |       | 1709275 | GC | G                      | HIGH     | FRAME_SHIFT           |
|             |            |       | 1709279 | T  | TG                     | HIGH     | FRAME_SHIFT           |
|             |            |       | 1709282 | G  | A                      | MODERATE | NON_SYNONYMOUS_CODING |
|             |            |       | 1709297 | C  | T                      | MODERATE | NON_SYNONYMOUS_CODING |
|             |            |       | 1709346 | T  | G                      | MODERATE | NON_SYNONYMOUS_CODING |
|             |            |       | 1709364 | G  | T                      | MODERATE | NON_SYNONYMOUS_CODING |
|             |            |       | 1709365 | C  | G                      | MODERATE | NON_SYNONYMOUS_CODING |
|             |            |       | 1709424 | T  | G                      | MODERATE | NON_SYNONYMOUS_CODING |
|             |            |       | 1709521 | A  | C                      | MODERATE | NON_SYNONYMOUS_CODING |
|             |            |       | 1709765 | T  | C                      | MODERATE | NON_SYNONYMOUS_CODING |
|             |            |       | 1709848 | T  | C                      | MODERATE | NON_SYNONYMOUS_CODING |
|             |            |       | 1709911 | A  | G                      | MODERATE | NON_SYNONYMOUS_CODING |
| <i>flgD</i> | BSNT_08140 | LaoA1 | 1710471 | G  | A                      | MODERATE | NON_SYNONYMOUS_CODING |
|             |            |       | 1710583 | C  | T                      | MODERATE | NON_SYNONYMOUS_CODING |
| <i>flgG</i> | BSNT_08141 | LaoA1 | 1711102 | A  | C                      | MODERATE | NON_SYNONYMOUS_CODING |
|             |            |       | 1711234 | G  | C                      | MODERATE | NON_SYNONYMOUS_CODING |
|             |            |       | 1711349 | A  | C                      | MODERATE | NON_SYNONYMOUS_CODING |
|             |            |       | 1711422 | G  | T                      | MODERATE | NON_SYNONYMOUS_CODING |
|             |            |       | 1711431 | T  | G                      | MODERATE | NON_SYNONYMOUS_CODING |
|             |            |       | 1711432 | C  | T                      | MODERATE | NON_SYNONYMOUS_CODING |
| <i>fliE</i> | BSNT_08131 |       |         |    |                        |          |                       |
| <i>fgB</i>  | BSNT_08129 | ThaB  | 1702165 | G  | A                      | MODERATE | NON_SYNONYMOUS_CODING |
| <i>fgC</i>  | BSNT_08130 | LaoA1 | 1702495 | A  | G                      | MODERATE | NON_SYNONYMOUS_CODING |
|             |            |       | 1702589 | T  | A                      | MODERATE | NON_SYNONYMOUS_CODING |
|             |            | ThaB  | 1702589 | T  | A                      | MODERATE | NON_SYNONYMOUS_CODING |
| <i>motA</i> | BSNT_07861 | LaoA1 | 1449492 | G  | GCTT                   | MODERATE | CODON_INSERTION       |
|             |            |       | 1450117 | C  | T                      | MODERATE | NON_SYNONYMOUS_CODING |
| <i>motB</i> | BSNT_07860 |       |         |    |                        |          |                       |
| *BSNT_08132 | BSNT_08132 | KorC1 | 1703577 | T  | TAATC<br>TCCCG<br>AAAG | HIGH     | FRAME_SHIFT           |

|             |            |       |         |   |                        |          |                       |
|-------------|------------|-------|---------|---|------------------------|----------|-----------------------|
|             |            | LaoA1 | 1703577 | T | TAATC<br>TCCCG<br>AAAG | HIGH     | FRAME_SHIFT           |
|             |            | MyaA2 | 1703577 | T | TAATC<br>TCCCG<br>AAAG | HIGH     | FRAME_SHIFT           |
|             |            | ThaB  | 1703305 | A | G                      | MODERATE | NON_SYNONYMOUS_CODING |
|             |            |       | 1703561 | A | G                      | MODERATE | NON_SYNONYMOUS_CODING |
|             |            |       | 1703582 | T | G                      | MODERATE | NON_SYNONYMOUS_CODING |
|             |            |       | 1703597 | G | A                      | MODERATE | NON_SYNONYMOUS_CODING |
|             |            | NepD5 | 1703577 | T | TAATC<br>TCCCG<br>AAAG | HIGH     | FRAME_SHIFT           |
| *BSNT_08133 | BSNT_08133 | LaoA1 | 1704272 | A | T                      | MODERATE | NON_SYNONYMOUS_CODING |
|             |            |       | 1704423 | A | G                      | MODERATE | NON_SYNONYMOUS_CODING |
| <i>fliG</i> | BSNT_08134 |       |         |   |                        |          |                       |
| <i>fliM</i> | BSNT_08144 | LaoA1 | 1712703 | A | T                      | MODERATE | NON_SYNONYMOUS_CODING |
| <i>fliA</i> | BSNT_08153 | KorC1 | 1719233 | T | A                      | MODERATE | NON_SYNONYMOUS_CODING |
|             |            | LaoA1 | 1719233 | T | A                      | MODERATE | NON_SYNONYMOUS_CODING |
|             |            | MyaA2 | 1719233 | T | A                      | MODERATE | NON_SYNONYMOUS_CODING |
|             |            | ThaB  | 1719233 | T | A                      | MODERATE | NON_SYNONYMOUS_CODING |
|             |            |       | 1719577 | C | G                      | MODERATE | NON_SYNONYMOUS_CODING |
| <i>fliB</i> | BSNT_08152 | LaoA1 | 1717483 | A | G                      | MODERATE | NON_SYNONYMOUS_CODING |
|             |            |       | 1717697 | G | A                      | MODERATE | NON_SYNONYMOUS_CODING |
| *BSNT_08135 | BSNT_08135 | LaoA1 | 1705840 | T | C                      | MODERATE | NON_SYNONYMOUS_CODING |
|             |            |       | 1705945 | G | A                      | MODERATE | NON_SYNONYMOUS_CODING |
|             |            |       | 1705966 | A | G                      | MODERATE | NON_SYNONYMOUS_CODING |
|             |            |       | 1705987 | A | G                      | MODERATE | NON_SYNONYMOUS_CODING |
|             |            |       | 1706030 | C | T                      | MODERATE | NON_SYNONYMOUS_CODING |
|             |            |       | 1706032 | T | A                      | MODERATE | NON_SYNONYMOUS_CODING |
|             |            |       | 1706035 | C | A                      | MODERATE | NON_SYNONYMOUS_CODING |
|             |            |       | 1706069 | G | C                      | MODERATE | NON_SYNONYMOUS_CODING |
| <i>fliI</i> | BSNT_08136 |       |         |   |                        |          |                       |
| <i>fliJ</i> | BSNT_08137 |       |         |   |                        |          |                       |

|             |            |       |         |   |   |          |                       |
|-------------|------------|-------|---------|---|---|----------|-----------------------|
| <i>fliP</i> | BSNT_08148 |       |         |   |   |          |                       |
| <i>floQ</i> | BSNT_08149 |       |         |   |   |          |                       |
| *BSNT_08150 | BSNT_08150 |       |         |   |   |          |                       |
| <i>fliT</i> | BSNT_10160 |       | 3494769 | C | T | MODERATE | NON_SYNONYMOUS_CODING |
|             |            | LaoA1 | 3494829 | C | T | MODERATE | NON_SYNONYMOUS_CODING |
|             |            |       | 3494897 | T | G | MODERATE | NON_SYNONYMOUS_CODING |
| <i>fliW</i> | BSNT_10166 |       | 3498920 | C | A | MODERATE | NON_SYNONYMOUS_CODING |
|             |            |       |         |   |   |          |                       |

\* indicates gene annotations that have been changed in the BEST195 genome from the annotation in *B. subtilis* 168. *fliF* in *B. subtilis* 168 has been reannotated as BSNT\_08132 and BSNT\_08133 in BEST195. *fliK*, *filH*, and *filR* have been reannotated as BSNT\_08139, BSNT\_08135, and BSNT\_08150 in BEST195, respectively.



## The result details for MLST analysis

**Table I.** The identified allelic profiles for multilocus sequence typing (MLST) genes and the sequence type defined in PubMLST

|             | BEST195 | 168 | KorC1 | LaoA1 | MyaA2 | ThaB | NepD5 | NAFM5 | NARUSE | TAKAHASHI |
|-------------|---------|-----|-------|-------|-------|------|-------|-------|--------|-----------|
| <i>glpF</i> | 3       | 1   | 61    | 3     | 1     | 3    | 3     | 3     | 3      | 3         |
| <i>ilvD</i> | 2       | 1   | 2     | 18    | 1     | 65   | 2     | 2     | 2      | 2         |
| <i>pta</i>  | 2       | 1   | 2     | 2     | 2     | 4    | 2     | 2     | 2      | 2         |
| <i>purH</i> | 6       | 1   | 6     | 24    | 6     | 6    | 6     | 6     | 6      | 6         |
| <i>pycA</i> | 4       | 1   | 4     | 20    | 4     | 4    | 4     | 4     | 4      | 4         |
| <i>rpoD</i> | 3       | 1   | 3     | 1     | 3     | 1    | 3     | 3     | 3      | 3         |
| <i>tpiA</i> | 4       | 1   | 1     | 1     | 4     | 1    | 4     | 4     | 4      | 4         |
| ST          | 4       | 1   | -     | 11    | -     | -    | 4     | 4     | 4      | 4         |

ST: Sequence type defined in PubMLST based on the allelic profile. –, sequence type is not defined in the database.
